# Supplementary material
Source: PubMed Central journal article supplement (PMC4451838)
Supplement: NIHMS608824-supplement-supplement_1.pdf [file NIHMS608824-supplement-supplement_1.pdf]

**Appendix A – in print:**

**Table A1: Sample Information – African and Coloured children born to female young adults interviewed in Wave 4**

|                                                                     | Number     | %    |
|---------------------------------------------------------------------|------------|------|
| African and Coloured female respondents in 2002 (Wave 1)            | 2300       |      |
| African and Coloured female respondents in 2006 (Wave 4)            | 1758       |      |
| <i>African and Coloured female response rate 2002-2006</i>          |            | 76.4 |
| African and Coloured female respondents who had given birth by 2006 | 737        | 41.9 |
| Children born to African and Coloured respondents by 2006           | 920        |      |
| Child sample                                                        | 832        |      |
| <i>Response Rate in Child Sample</i>                                |            | 90.4 |
| First born children - the analysis sample                           | <b>686</b> |      |
| <i>% born to teen mothers</i>                                       |            | 56.6 |

Notes to Table A1: The analysis sample includes all first born children of African and Coloured female respondents successfully interviewed in 2006. The child sample response rate gives the percentage of children born by 2006 who had a child questionnaire completed on their behalf.

**Table A2 Description of Variables used in Propensity score estimate**

---



---

|                                           |                                                                                  |
|-------------------------------------------|----------------------------------------------------------------------------------|
| <i>Born to a teenage mother indicator</i> |                                                                                  |
| Teen                                      | Child's mother gave birth to them before the age of 20                           |
| <i>Mother's characteristics:</i>          |                                                                                  |
| Age                                       | Mother's age at wave 4 interview (2006) -quadratic included                      |
| Coloured                                  | Indicator that the mother is coloured                                            |
| Numeracy score                            | Age standardised numeracy score                                                  |
| Literacy score                            | Age standardised literacy score                                                  |
| Education                                 | Highest grade completed by age 12                                                |
| Failed                                    | Mother failed at least one grade by age 12                                       |
| Menarche                                  | Age at menarche                                                                  |
| <i>Mother's first sexual experience:</i>  |                                                                                  |
| Sexual debut                              | Age of sexual debut -quadratic included                                          |
| Condom                                    | Used condom at first sex                                                         |
| <i>Mother's childhood household:</i>      |                                                                                  |
| Poor                                      | Mother defines her childhood household as poor or very poor                      |
| Drugs                                     | When growing up (up to age 14) lived with someone who used street drugs          |
| Alcoholic                                 | When growing up (up to age 14) lived with someone who was an alcoholic           |
| Live with mother                          | Proportion of first 13 years (age 0 to 12) that mother lived with her mother     |
| Lived with father                         | Proportion of first 13 years (age 0 to 12) that mother lived with her father     |
| Lived with maternal grndprnt(s)           | Proportion of first 13 years (age 0 to 12)lived with her maternal grandparent(s) |
| Mother's education                        | Mother's mother's highest level of education                                     |
| Father's education                        | Mother's father's highest level of education                                     |
| <i>Mother's household in Wave 1:</i>      |                                                                                  |
| Neighbourhood income                      | The logarithm of mean household income in Wave 1 subplace                        |
| Owned 5 books                             | Someone in Wave 1 household owned 5 or more books                                |

---



---

Notes to Table A.2: The table details pre-childbearing observable characteristics from the Cape Area Panel Study data used to predict the probability of having a teen birth.

**Table A3: External balancing tests**

|                                                                           | African and coloured            |               |        |                |                                 |               |        |                |
|---------------------------------------------------------------------------|---------------------------------|---------------|--------|----------------|---------------------------------|---------------|--------|----------------|
|                                                                           | Original sample weight          |               |        |                | Inverse probability weight      |               |        |                |
|                                                                           | Difference<br>(Teen -<br>Older) | Std.<br>Error | T-stat | Sign.<br>Diff. | Difference<br>(Teen -<br>Older) | Std.<br>Error | T-stat | Sign.<br>Diff. |
| Schooling                                                                 |                                 |               |        |                |                                 |               |        |                |
| Failed grade when 10                                                      | -0.01                           | 0.02          | -0.33  | ***            | 0.01                            | 0.02          | 0.68   |                |
| First sex                                                                 |                                 |               |        |                |                                 |               |        |                |
| Use contraception at first sex                                            | -0.09                           | 0.05          | -1.91  | ***            | -0.03                           | 0.07          | -0.39  |                |
| Wave 1 household characteristics                                          |                                 |               |        |                |                                 |               |        |                |
| Wave 1 household per capita income                                        | -38.74                          | 83.25         | -0.47  | ***            | -22.04                          | 92.42         | -0.24  |                |
| Room permanent                                                            | 0.00                            | 0.06          | -0.01  | ***            | 0.01                            | 0.10          | 0.15   |                |
| Flush toilet                                                              | 0.00                            | 0.04          | -0.08  | ***            | -0.01                           | 0.06          | -0.12  |                |
| Childhood living arrangements                                             |                                 |               |        |                |                                 |               |        |                |
| Lived with mother age 6                                                   | -0.03                           | 0.03          | -0.90  | ***            | -0.07                           | 0.05          | -1.39  |                |
| Lived with mother age 7                                                   | -0.02                           | 0.03          | -0.46  | ***            | -0.06                           | 0.05          | -1.10  |                |
| Lived with mother age 9                                                   | 0.00                            | 0.04          | 0.09   | *              | -0.06                           | 0.05          | -1.16  |                |
| Lived with father age 7                                                   | -0.01                           | 0.04          | -0.18  | ***            | -0.08                           | 0.08          | -1.10  |                |
| Lived with father age 8                                                   | 0.00                            | 0.05          | 0.09   | *              | -0.08                           | 0.08          | -1.09  |                |
| Lived with father age 9                                                   | -0.01                           | 0.04          | -0.33  | ***            | -0.11                           | 0.08          | -1.39  |                |
| Lived with father age 10                                                  | 0.00                            | 0.05          | -0.07  | ***            | -0.09                           | 0.08          | -1.20  |                |
| Parental time investment                                                  |                                 |               |        |                |                                 |               |        |                |
| Father helps with homework                                                | -0.03                           | 0.03          | -1.14  | ***            | -0.04                           | 0.04          | -1.10  |                |
| Mother spent time with just YA at least once<br>a month in past 12 months | -0.06                           | 0.05          | -1.16  | ***            | -0.04                           | 0.08          | -0.53  |                |

Notes to Table A.3: The table presents the difference in means between teen and older mothers, the standard error of this difference and whether it is significant using the sample weight and the inverse propensity score weight. Variables included are those not included in the propensity score estimation but found to be significantly different between teen and older mothers when weighted using the sample weight. Other variables not included in the table given that they were not found to be significantly different at base include characteristics of the school – problems, number of learners per class, time taken to school - , failure at other grades, wave 1 asset ownership, living arrangements at other ages since birth and parent time investment – mother helped with homework and discussed personal matters with young adult more than once per month in past 12 months. Differences marked with three asterisks (\*\*\*) are significant at the 1% level, those marked with two (\*\*) are significant at the 5% level, and those marked with one (\*) are significant at the 10% level. The table shows that once the data are weighted by the inverse propensity score weight, differences between teen and older mother characteristics are eliminated or ‘balanced’.

**Figure A1: Distribution of the estimated propensity scores by population group**

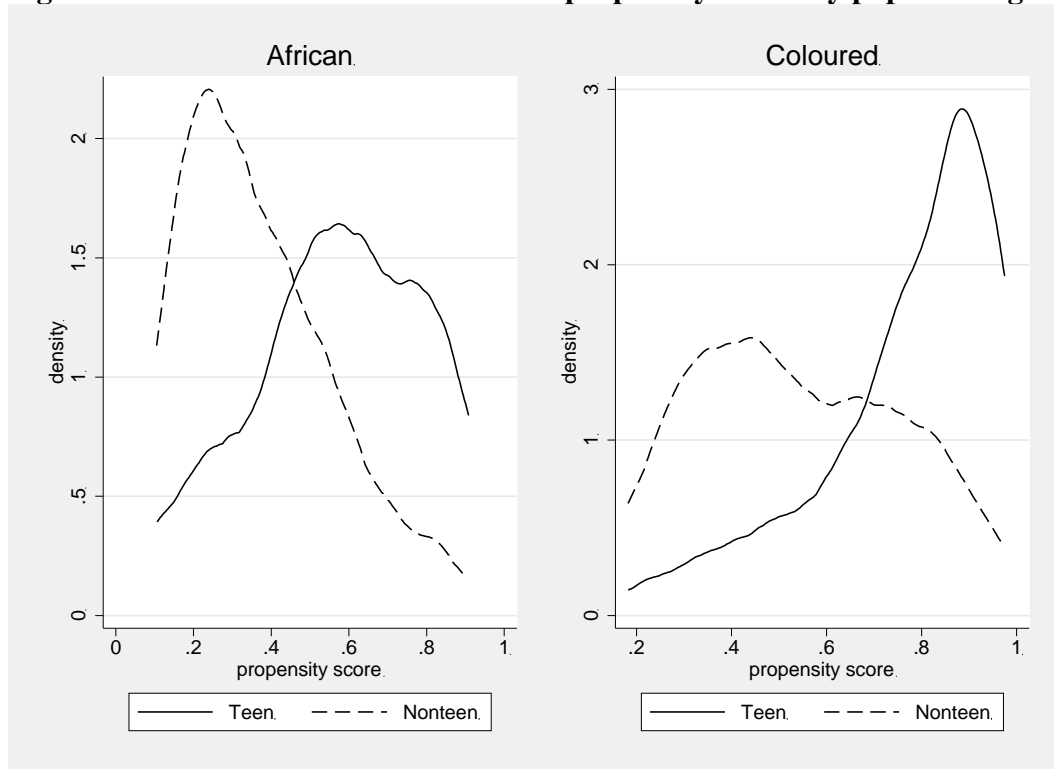

Notes to Figure A.1: The figure presents the distribution of the propensity score for teen and older mothers for Africans and coloureds separately. The propensity score is the conditional probability that the child's mother gave birth to them in her teens. The propensity score is calculated using a logit specification.

## Appendix B – on-line

**Table B1: Mother's age at first child's birth**

| Age     | Teen  |      | %    |
|---------|-------|------|------|
|         | Older | %    |      |
| 13      | 1     |      | 0.2  |
| 14      | 5     |      | 0.7  |
| 15      | 22    |      | 3.2  |
| 16      | 53    |      | 7.7  |
| 17      | 85    |      | 12.4 |
| 18      | 115   |      | 16.8 |
| 19      | 107   |      | 15.6 |
| 20      |       | 88   | 12.8 |
| 21      |       | 70   | 10.2 |
| 22      |       | 65   | 9.5  |
| 23      |       | 45   | 6.6  |
| 24      |       | 18   | 2.6  |
| 25      |       | 9    | 1.3  |
| 26      |       | 3    | 0.4  |
| Total   | 388   | 298  | 100  |
| Average | 17.5  | 21.6 |      |

Notes to Table B1: The table presents the number and distribution of children by their mother's age at first birth. In addition, the average age of teen and older mothers is presented.

**Table B2: Percentage of women who had given birth by age in wave 4**

| Age of female<br>YA at wave 4 | All   |     | African |     | Coloured |     |
|-------------------------------|-------|-----|---------|-----|----------|-----|
|                               | %     | n   | %       | n   | %        | n   |
| 17                            | 6.66  | 50  | 12.11   | 28  | 2.81     | 22  |
| 18                            | 15.93 | 175 | 12.92   | 78  | 17.13    | 97  |
| 19                            | 26.70 | 214 | 24.67   | 104 | 27.69    | 110 |
| 20                            | 27.84 | 219 | 27.87   | 107 | 27.83    | 112 |
| 21                            | 37.99 | 219 | 44.66   | 101 | 35.10    | 118 |
| 22                            | 36.23 | 217 | 37.17   | 111 | 35.76    | 106 |
| 23                            | 46.79 | 192 | 48.18   | 108 | 45.93    | 84  |
| 24                            | 66.19 | 177 | 71.24   | 101 | 62.91    | 76  |
| 25                            | 72.44 | 152 | 74.86   | 76  | 71.23    | 76  |
| 26                            | 74.72 | 117 | 73.21   | 70  | 75.78    | 47  |
| 27                            | 63.21 | 12  | 58.87   | 9   | 67.62    | 3   |

Notes to Table B2: The table presents the percentage and number of female young adults who had given birth by their age in wave 4 (2006).

**Table B3. Attrition information**

|                                      | African         |                                          |                                    |                                 |                                          | Coloured        |                                          |                                    |                                 |                                          |
|--------------------------------------|-----------------|------------------------------------------|------------------------------------|---------------------------------|------------------------------------------|-----------------|------------------------------------------|------------------------------------|---------------------------------|------------------------------------------|
|                                      | Analysis sample | No information                           |                                    |                                 |                                          | Analysis sample | No information                           |                                    |                                 |                                          |
|                                      |                 | not interviewed w4 or w3, no birth by w1 | not interviewed w4, no birth by w3 | not interviewed w4, birth by w3 | interviewed in w4, child q not completed |                 | not interviewed w4 or w3, no birth by w1 | not interviewed w4, no birth by w3 | not interviewed w4, birth by w3 | interviewed in w4, child q not completed |
| Age in 2002                          | 18.97           | 18.68                                    | 17.65                              | 19.33                           | 19.44                                    | 18.69           | 18.99                                    | 17.53                              | 19.46                           | 19.08                                    |
| African                              | 1.00            | 1.00                                     | 1.00                               | 1.00                            | 1.00                                     | 0.00            | 0.00                                     | 0.00                               | 0.00                            | 0.00                                     |
| Age at sexual debut                  | 16.48           | 16.35                                    | 16.91                              | 16.33                           | 15.94                                    | 17.25           | 17.04                                    | 18.33                              | 17.54                           | 16.77                                    |
| age at menarche                      | 14.22           | 14.21                                    | 13.63                              | 14.26                           | 14.40                                    | 12.96           | 12.76                                    | 12.54                              | 13.00                           | 13.04                                    |
| w1 hh contains 5 books               | 0.61            | 0.61                                     | 0.77                               | 0.63                            | 0.44                                     | 0.84            | 0.86                                     | 0.90                               | 0.71                            | 0.76                                     |
| drugs in childhood hh                | 0.04            | 0.03                                     | 0.07                               | 0.07                            | 0.04                                     | 0.15            | 0.10                                     | 0.13                               | 0.11                            | 0.20                                     |
| alcoholic in childhood hh            | 0.22            | 0.18                                     | 0.26                               | 0.26                            | 0.26                                     | 0.25            | 0.19                                     | 0.23                               | 0.32                            | 0.28                                     |
| Literacy numeracy score              | -0.48           | -0.47                                    | -0.45                              | -0.51                           | -0.41                                    | 0.02            | 0.24                                     | 0.34                               | 0.06                            | -0.20                                    |
| completed level of education in 2002 | 9.82            | 9.89                                     | 12.09                              | 9.93                            | 10.44                                    | 9.98            | 11.53                                    | 10.96                              | 10.21                           | 9.68                                     |
| grandmother's education              | 7.37            | 7.78                                     | 8.41                               | 8.82                            | 7.80                                     | 7.68            | 8.99                                     | 9.35                               | 7.48                            | 8.32                                     |
| grandfather's education              | 6.56            | 7.04                                     | 7.63                               | 7.71                            | 8.35                                     | 8.09            | 9.77                                     | 10.00                              | 9.00                            | 8.06                                     |
| sample size                          | 352             | 248                                      | 43                                 | 27                              | 48                                       | 334             | 113                                      | 80                                 | 28                              | 25                                       |
| % of respondents                     | 49%             | 35%                                      | 6%                                 | 4%                              | 7%                                       | 58%             | 19%                                      | 14%                                | 5%                              | 4%                                       |
| Know teen status                     | Yes             | No                                       | No                                 | Yes                             | Yes                                      | Yes             | No                                       | No                                 | Yes                             | Yes                                      |

Notes to Table B3: The table presents information on the sample of African and coloured female respondents who could potentially have had children by wave 4. Samples presented separately for Africans and coloureds. Those who are not included in the sample (no information) are categorised into four groups based on when they were last interviewed and whether or not they had had child by this time.

**Table B4: Comparing outcomes for children born to teen versus older mothers within specified risk groups**

|                                                                       | Teen   |     | Older  |     | Diff.<br>(Teen-<br>older) | Diff.<br>(Teen-<br>older) |
|-----------------------------------------------------------------------|--------|-----|--------|-----|---------------------------|---------------------------|
|                                                                       | Mean   | N   | Mean   | N   | Mean                      | T-stat                    |
| Mother lived with an alcoholic or drug user in first 14 years of life |        |     |        |     |                           |                           |
| HAZ                                                                   | -1.114 | 104 | -0.777 | 53  | -0.337                    | -0.641                    |
| Stunted                                                               | 0.348  | 104 | 0.418  | 53  | -0.070                    | -0.670                    |
| WAZ at birth                                                          | -0.959 | 93  | -0.534 | 55  | -0.425                    | -1.712                    |
| Birthweight <2.5 kg                                                   | 0.202  | 93  | 0.058  | 55  | 0.143                     | 2.503                     |
| HCZ at birth                                                          | -1.064 | 70  | -0.307 | 43  | -0.757                    | -2.047                    |
| Small head                                                            | 0.279  | 70  | 0.091  | 43  | 0.188                     | 2.583                     |
| Mother defines her childhood household as poor or very poor           |        |     |        |     |                           |                           |
| HAZ                                                                   | -1.275 | 58  | -0.761 | 50  | -0.5146                   | -1.352                    |
| Stunted                                                               | 0.354  | 58  | 0.215  | 50  | 0.13921                   | 1.423                     |
| WAZ at birth                                                          | -0.853 | 49  | -0.551 | 51  | -0.302                    | -1.090                    |
| Birthweight <2.5 kg                                                   | 0.189  | 49  | 0.141  | 51  | 0.04794                   | 0.563                     |
| HCZ at birth                                                          | -0.769 | 36  | -0.440 | 42  | -0.3287                   | -0.819                    |
| Small head                                                            | 0.079  | 36  | 0.150  | 42  | -0.0711                   | -0.845                    |
| Sexual debut before age 17                                            |        |     |        |     |                           |                           |
| HAZ                                                                   | -1.370 | 199 | -0.365 | 61  | -1.0051                   | -2.682                    |
| Stunted                                                               | 0.342  | 199 | 0.235  | 61  | 0.10712                   | 1.527                     |
| WAZ at birth                                                          | -0.730 | 170 | -0.327 | 68  | -0.4031                   | -2.296                    |
| Birthweight <2.5 kg                                                   | 0.162  | 170 | 0.082  | 68  | 0.08057                   | 1.427                     |
| HCZ at birth                                                          | -0.594 | 129 | -0.558 | 54  | -0.0362                   | -0.133                    |
| Small head                                                            | 0.130  | 129 | 0.150  | 54  | -0.0192                   | -0.267                    |
| Numeracy and literacy score below the standardised mean               |        |     |        |     |                           |                           |
| HAZ                                                                   | -1.418 | 159 | -0.773 | 113 | -0.6451                   | -2.285                    |
| Stunted                                                               | 0.384  | 159 | 0.271  | 113 | 0.11269                   | 1.770                     |
| WAZ at birth                                                          | -0.806 | 136 | -0.779 | 110 | -0.0274                   | -0.144                    |
| Birthweight <2.5 kg                                                   | 0.168  | 136 | 0.158  | 110 | 0.0102                    | 0.203                     |
| HCZ at birth                                                          | -0.733 | 104 | -0.621 | 89  | -0.1127                   | -0.409                    |
| Small head                                                            | 0.136  | 104 | 0.183  | 89  | -0.0473                   | -0.772                    |

Notes to Table B4: The table compares the outcomes of children born to teen mothers within certain identified risk groups.

**Table B5: Teen coefficient from regressions using different age intervals for teen versus older mothers**

|                  | Original | 16-19 versus<br>20-23 | 15-19 versus<br>20-24 | 14-19 versus<br>20-25 |
|------------------|----------|-----------------------|-----------------------|-----------------------|
| WAZ at birth     | -0.218   | -0.222                | -0.230                | -0.217                |
| low birth weight | 0.101    | 0.096                 | 0.096                 | 0.094                 |
| observations     | 418      | 387                   | 408                   | 415                   |
| current HAZ      | -1.031   | -1.021                | -1.017                | -1.033                |
| stunted          | 0.185    | 0.185                 | 0.182                 | 0.185                 |
| observations     | 463      | 431                   | 454                   | 462                   |

Notes to Table B5: The table presents results of the sensitivity of the teen coefficient estimates to the definition of teen mother. Column 1 presents the results on the full sample of teen mothers who gave birth before age 20 and older mothers who gave birth after and including age 20 (Original), Column 2 presents the results when teens are restricted to mothers who gave birth between ages 16 and 19 and older mothers 20-23 (16-19 versus 20-23) etc.

**Table B6: Sensitivity of regression results to propensity score**

|                       | All<br>teen<br>coeff | pscore< median<br>teen<br>coeff | Sample |       | pscore>=median<br>teen<br>coeff | Sample |       |
|-----------------------|----------------------|---------------------------------|--------|-------|---------------------------------|--------|-------|
|                       |                      |                                 | teen   | older |                                 | teen   | older |
| stunted               | 0.185                | 0.064                           | 90     | 149   | 0.259                           | 191    | 37    |
| length for age zscore | -1.031               | -0.663                          | 90     | 149   | -1.382                          | 191    | 37    |
| low birthweight       | 0.101                | 0.151                           | 66     | 144   | 0.031                           | 161    | 47    |
| birth weight zscore   | -0.218               | -0.358                          | 66     | 144   | -0.071                          | 161    | 47    |

Notes to Table B6: The table presents estimates of the teen coefficient when the sample is restricted to respondents with propensity scores below (columns 2-5) and above (columns 6-8) the median propensity score value (0.59).
